# Supplementary material for: Digital dissection of the head of the rock dove (Columba livia) using contrast-enhanced computed tomography
Source: PubMed Central journal article supplement (PMC6558907; doi:10.1186/s40851-019-0129-z), 2019-06-10

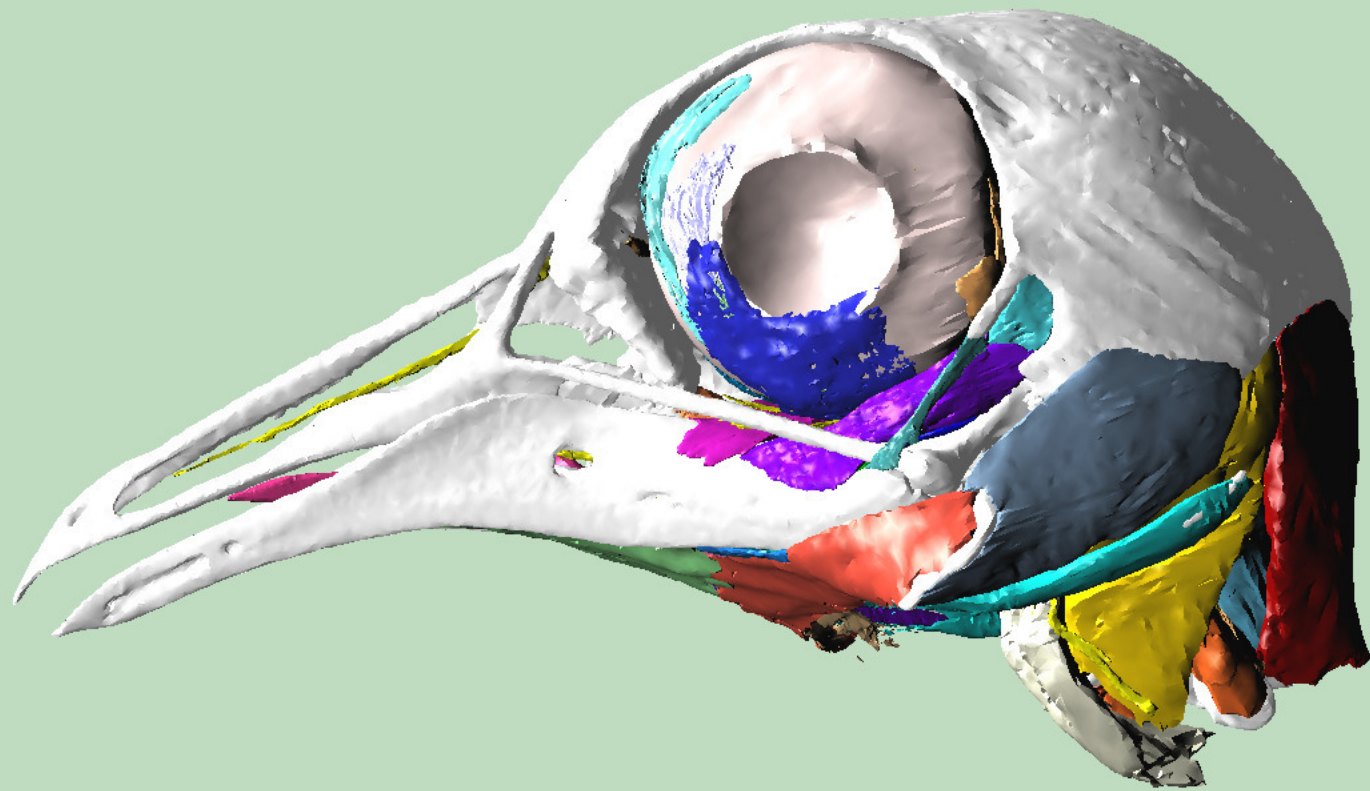

Supplement: 40851_2019_129_MOESM1_ESM.pdf [file 40851_2019_129_MOESM1_ESM.pdf]
